# Supplementary material
Source: Research Square preprint supplement (doi:10.21203/rs.3.rs-9400484/v1)
Supplement: Supplementary file 1 [file 195c1743d1873c95bbb692c6.docx]

**Appendix A.**

**Coding protocol**

| **Category** | **Definition** | **Examples** |
| --- | --- | --- |
| Lexical Framing | Words used to describe military actions | “strikes,” “attack,” “operation,” “targeted” |
| Source Attribution | Identification of the source of information | “according to,” “official said,” “reportedly” |
| Numerical Data | Use of quantitative or statistical information | Poll percentages, missile counts, casualty figures |
| Modality Markers | Expressions indicating certainty or uncertainty | “reportedly,” “allegedly,” “claimed,” “said” |
| Quoted Voices | Direct or indirect quotations from individuals | “Trump said,” “officials stated,” “analysts noted” |
